# Supplementary material for: The Value of Platelet-to-Lymphocyte Ratio as a Prognostic Marker in Cholangiocarcinoma: A Systematic Review and Meta-Analysis
Source: MDPI journal article supplement (doi:10.3390/cancers14020438), 2022-01-16
Supplement: s1 [file s1]

**A**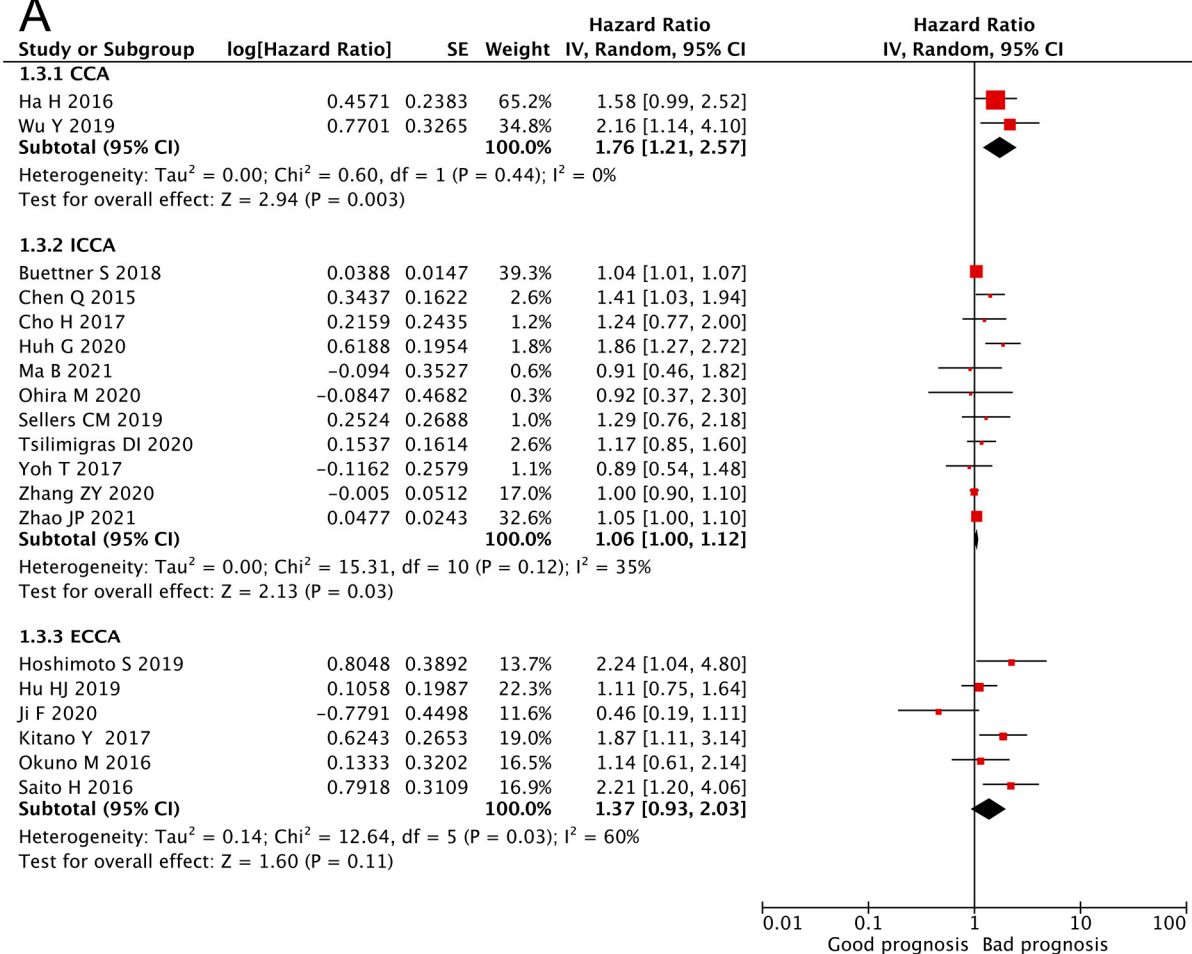

## B

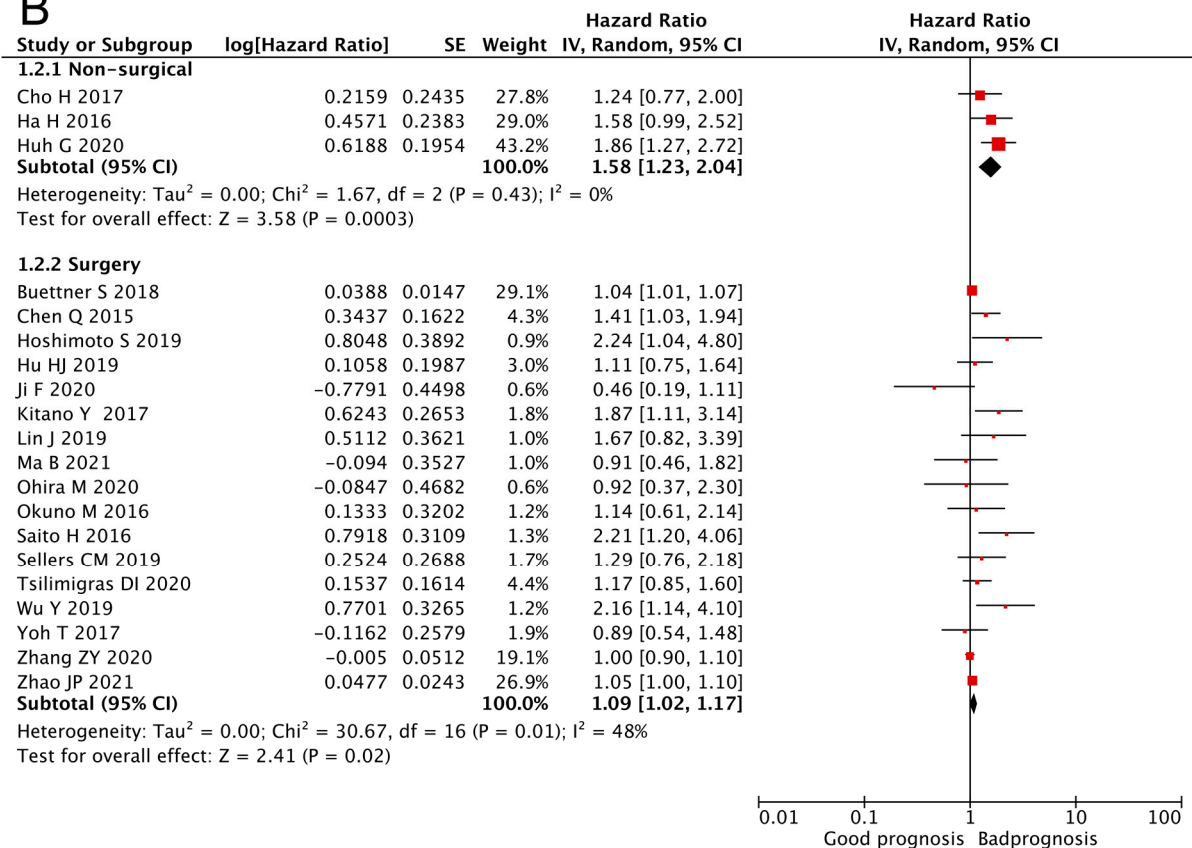

## C

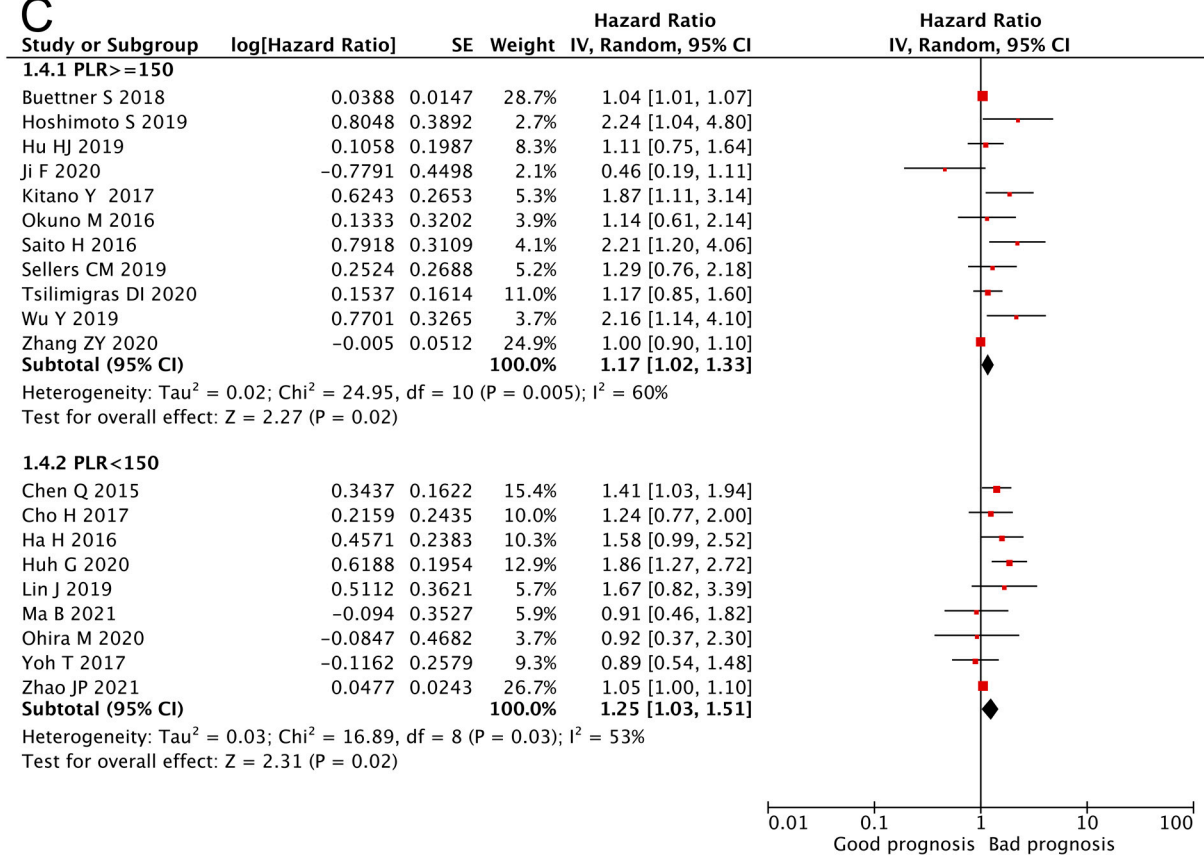

## D

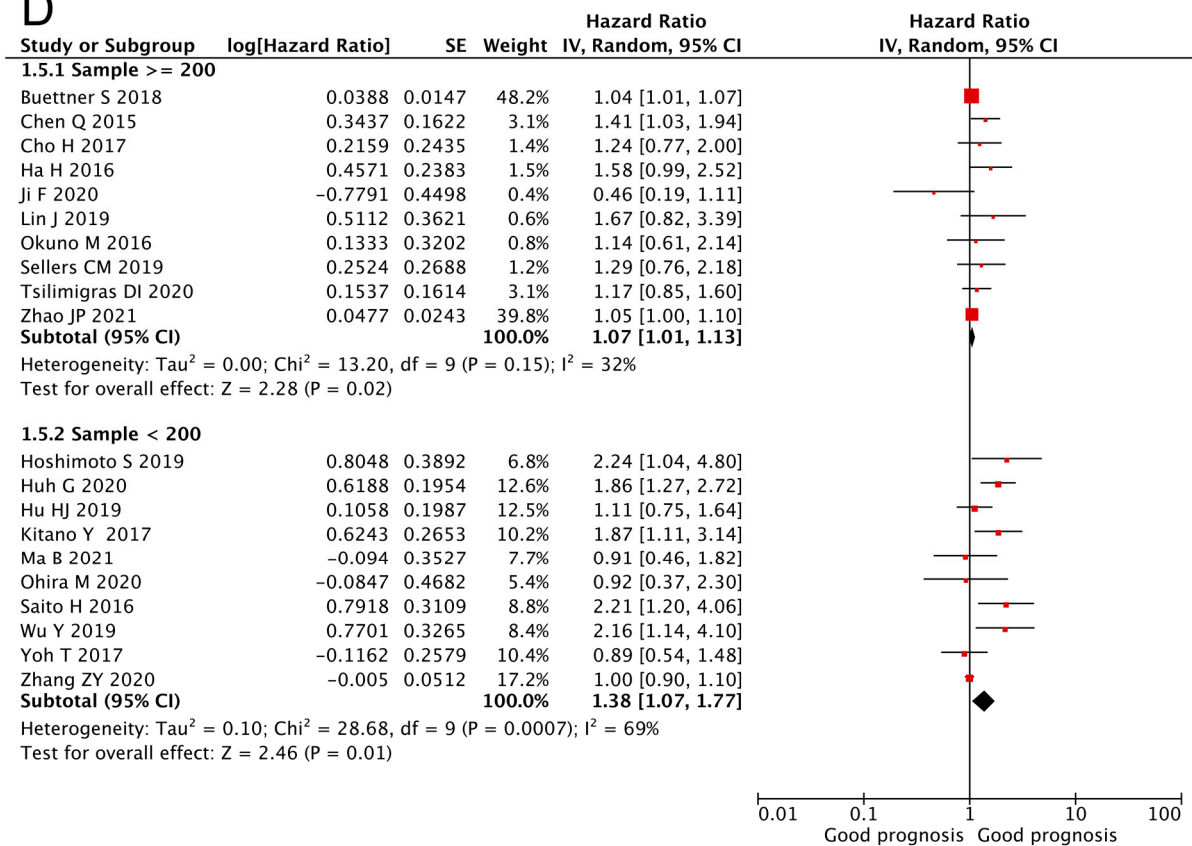

## E

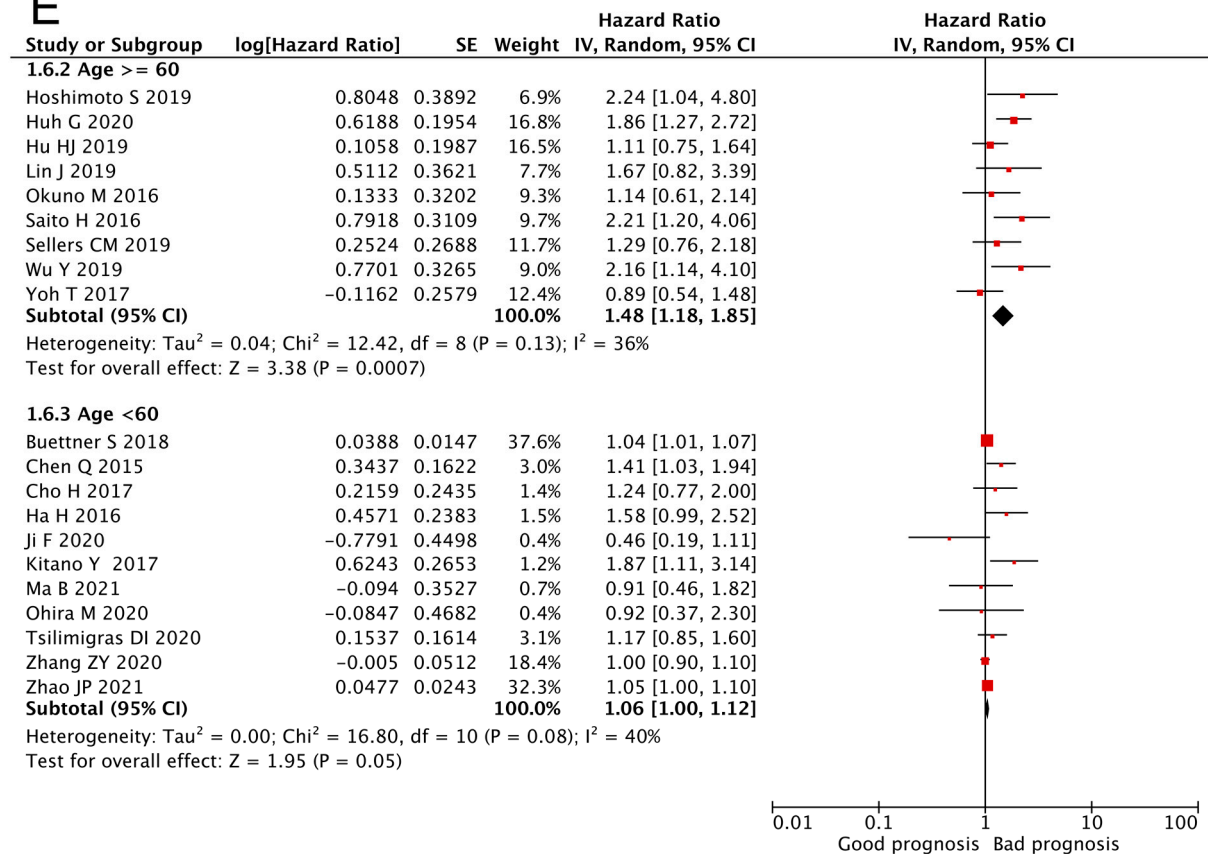

**Figure S1.** Stratified forest plots of the association between the PLR and OS in CCA patients. Subgroup analysis of the association between the PLR and OS based on cancer type (A), treatment (B), PLR cut-off values (C), sample size (D) and age (E). A random-effects model was used. OS, overall survival; PLR, platelet-to-lymphocyte ratio.

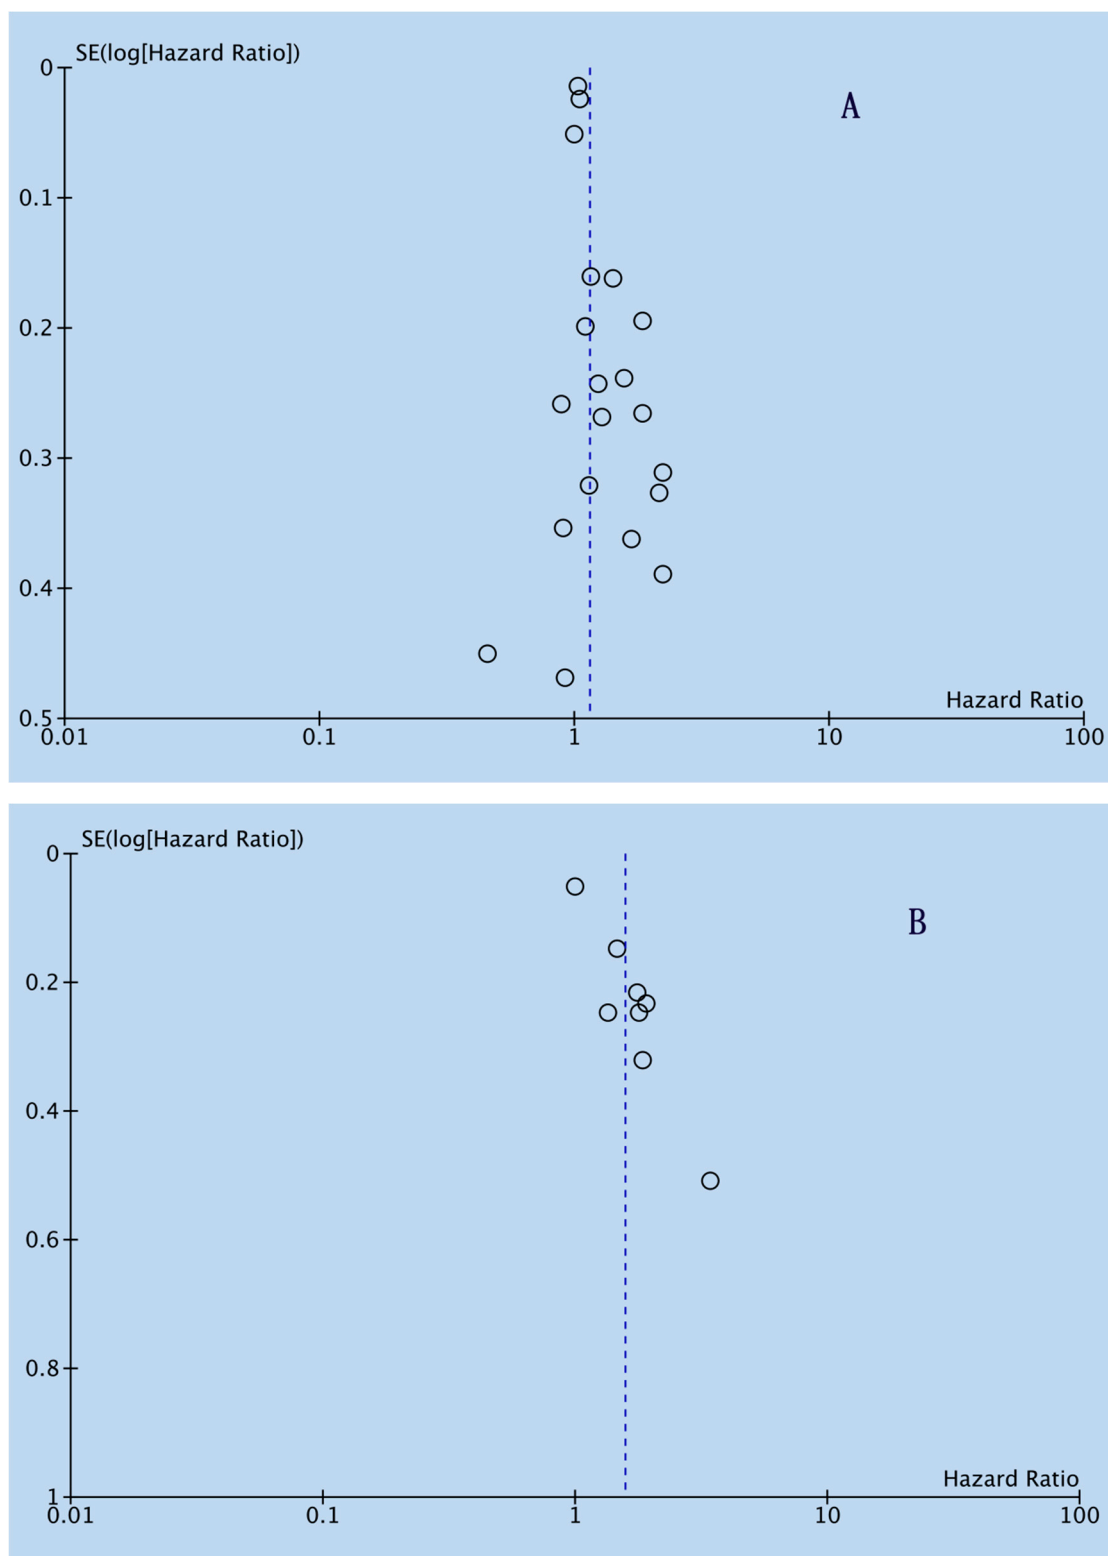

**Figure S2. Funnel plot of the meta-analysis of PLR in OS(A) and DFS(B).**
